# Supplementary material for: Gender-Related Differences in Prodromal Multiple Sclerosis Characteristics: A 7-Year Observation Study
Source: J Clin Med. 2021 Aug 26;10(17):3821. doi: 10.3390/jcm10173821 (PMC8432063; doi:10.3390/jcm10173821)
Supplement: Supplementary file 1 [file jcm-10-03821-s001.zip › figureS1-11.pdf]

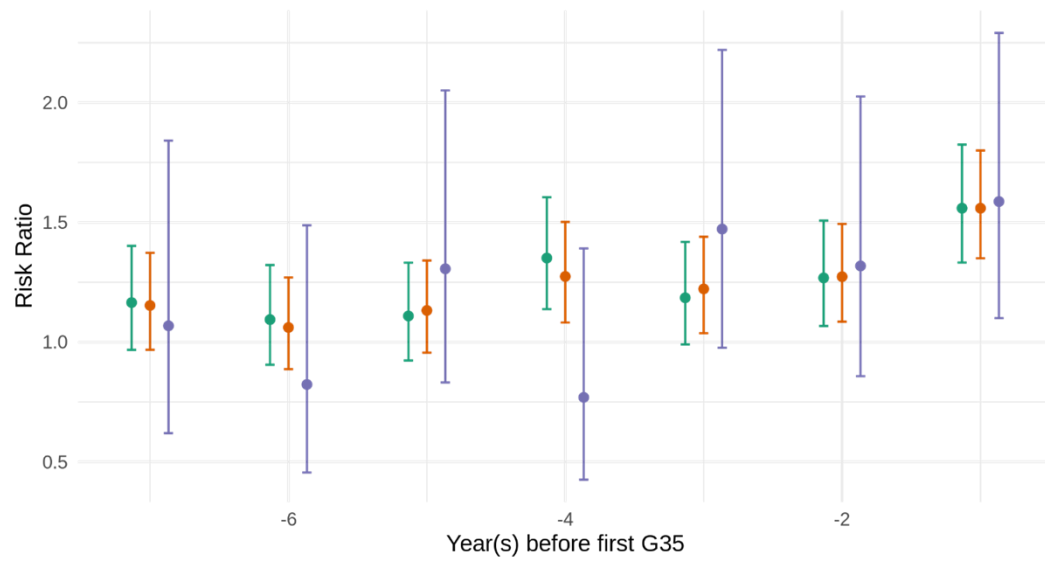

Figure S1 Urinary Tract Diseases

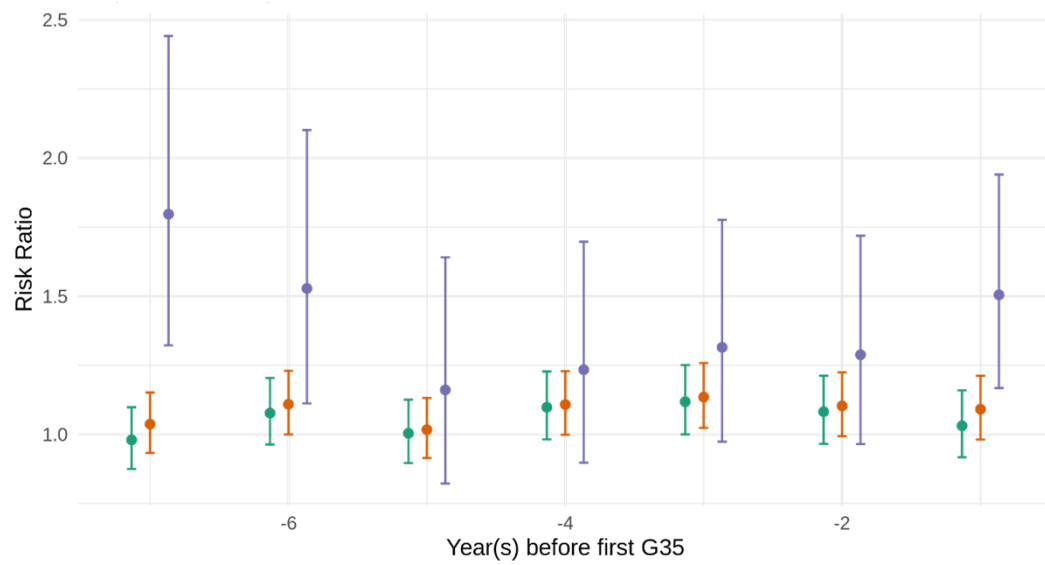

Figure S2 Reproductive\_System\_Diseases

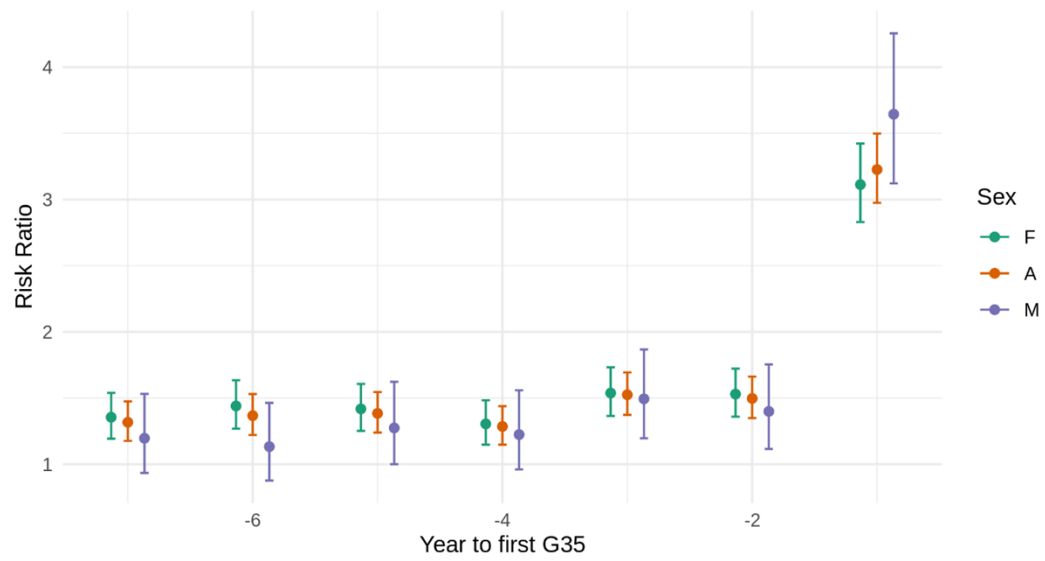

Figure S3 Ophthalmic Diseases

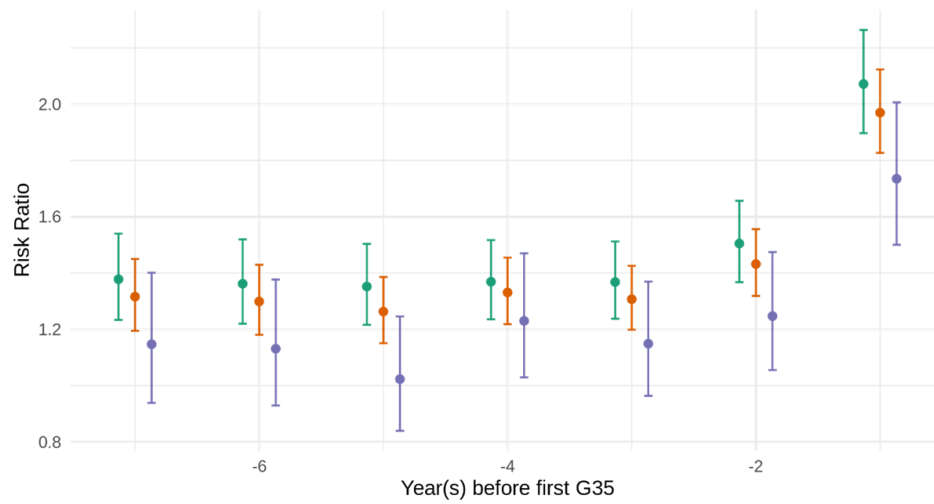

Figure S4 Musculoskeletal Diseases

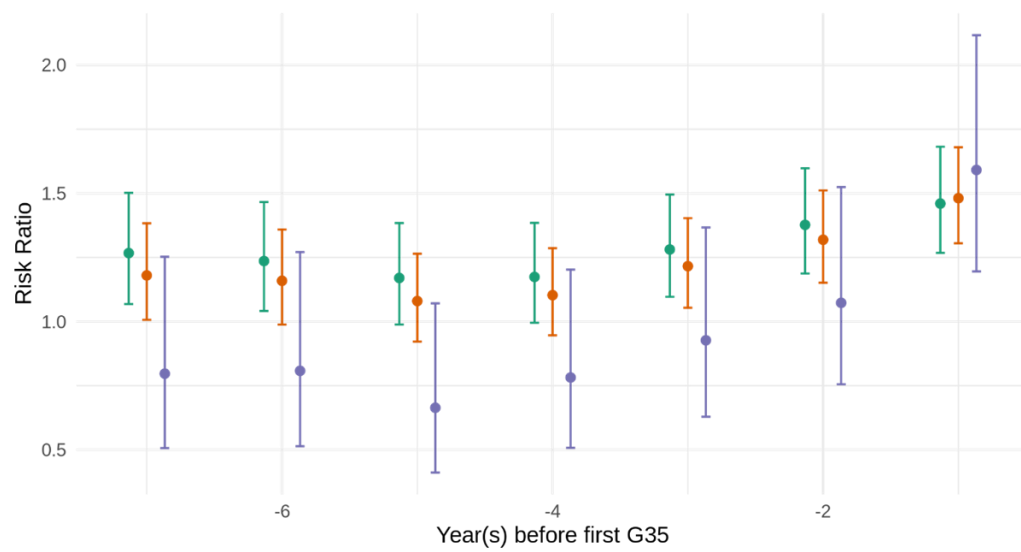

Figure S5 Mental illnesses

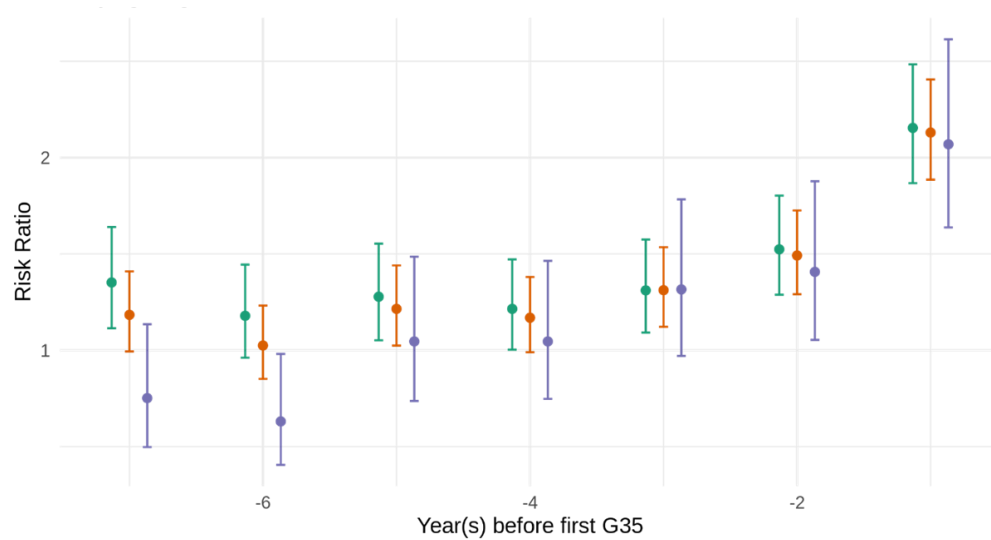

Figure S6 Laryngological Diseases

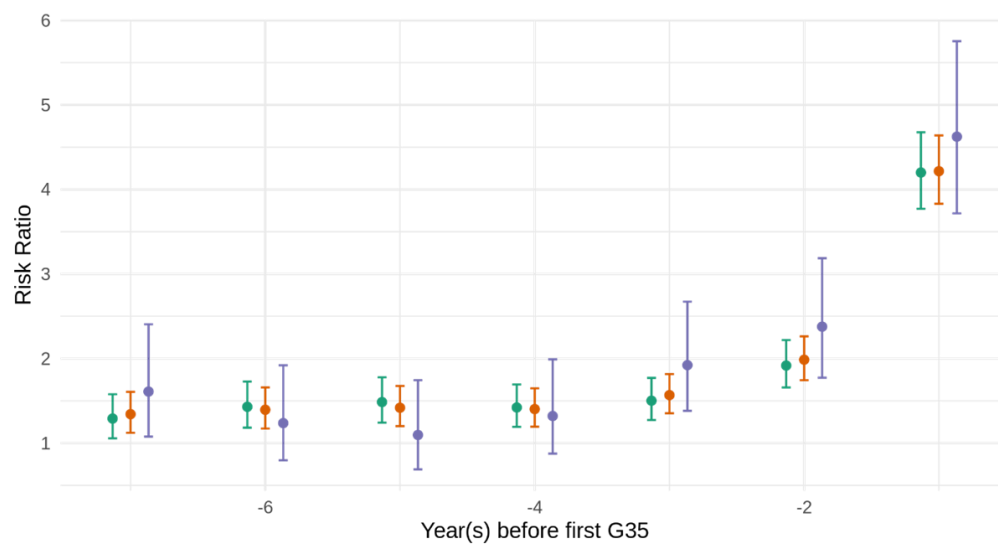

Figure S7 Headaches

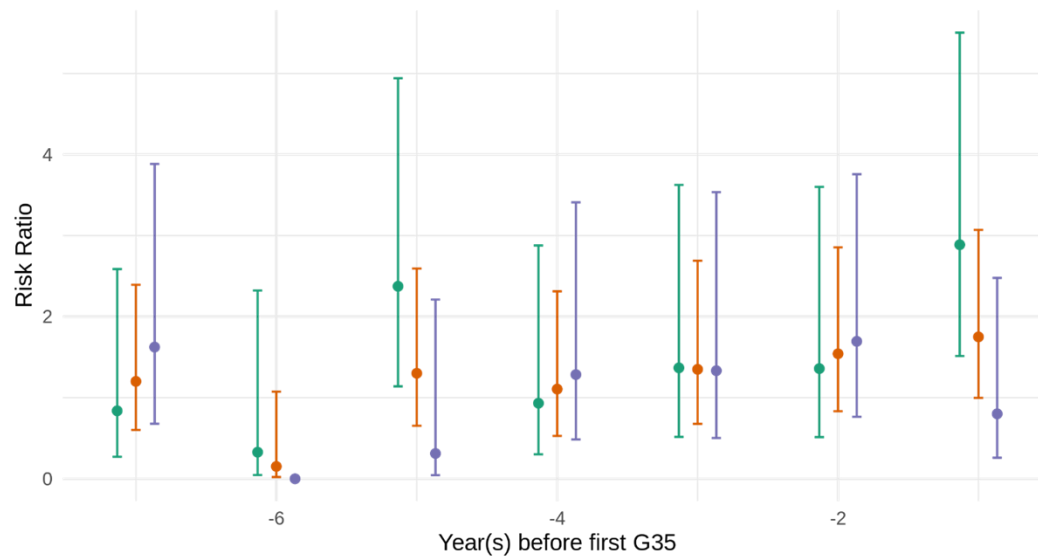

Figure S8 Head Injuries

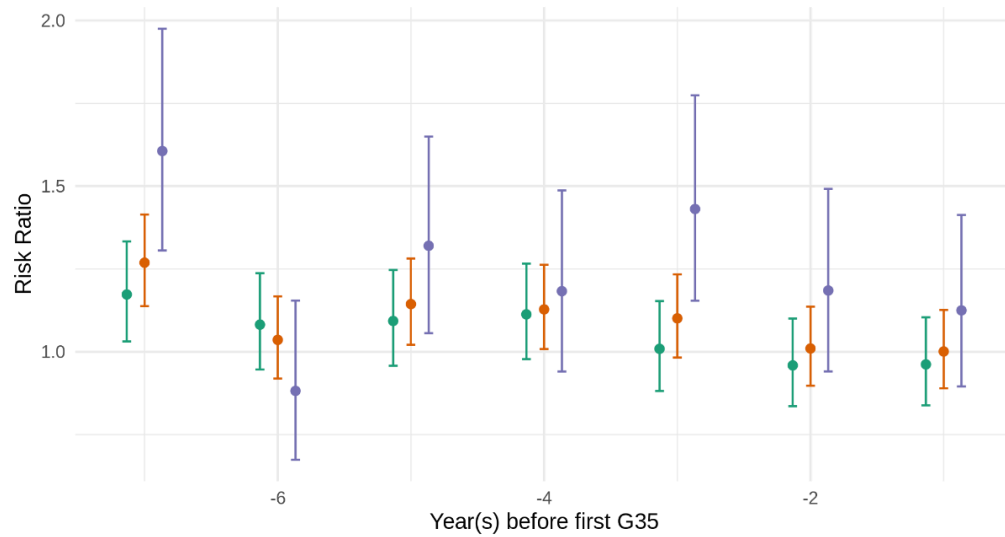

Figure S9 Dermatological Diseases

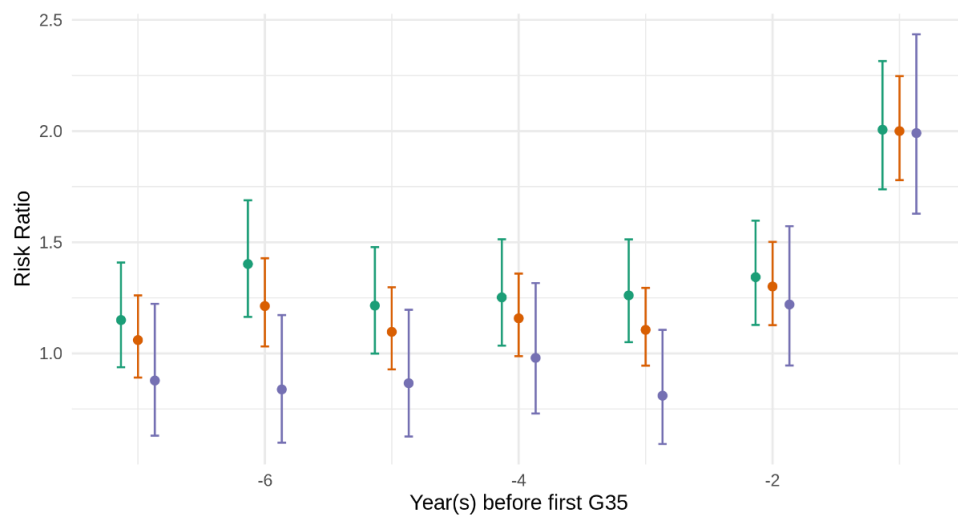

Figure S10 Cardiovascular Diseases

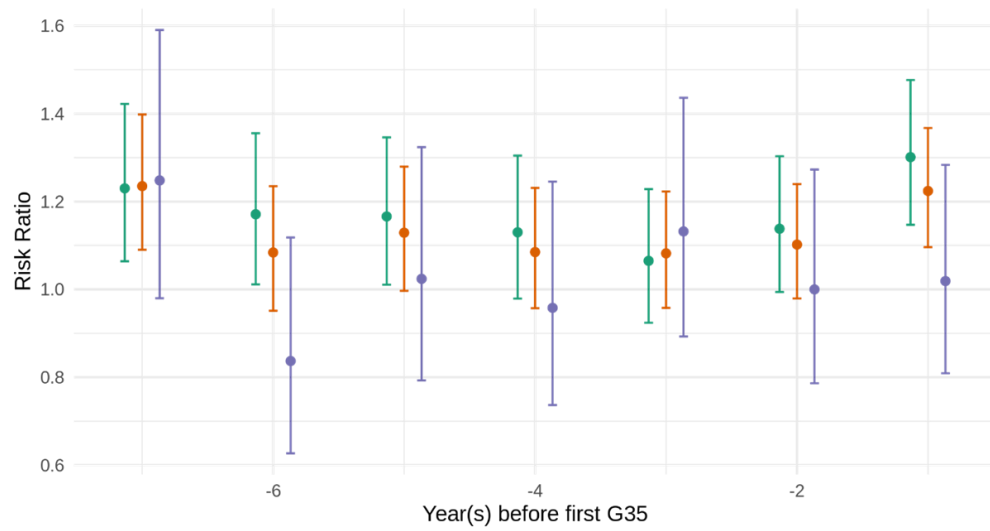

Figure S11 Digestive System Diseases
