# Supplementary material for: Gender-Related Differences in Prodromal Multiple Sclerosis Characteristics: A 7-Year Observation Study
Source: J Clin Med. 2021 Aug 26;10(17):3821. doi: 10.3390/jcm10173821 (PMC8432063; doi:10.3390/jcm10173821)
Supplement: Supplementary file 1 [file jcm-10-03821-s001.zip › Table_S1.pdf]

**Table S1.** Risk Ratio estimates within subgroups

| Condition                    | All             |                |                 | Female          |                |                 | Male            |                |                 |
|------------------------------|-----------------|----------------|-----------------|-----------------|----------------|-----------------|-----------------|----------------|-----------------|
|                              | Risk Ratio (RR) | 95% RR CI      | <i>p</i> -value | Risk Ratio (RR) | 95% RR CI      | <i>p</i> -value | Risk Ratio (RR) | 95% RR CI      | <i>p</i> -value |
| Urinary tract diseases       | 1.255           | (1.155, 1.365) | < 0.001         | 1.274           | (1.16, 1.399)  | < 0.001         | 1.223           | (0.995, 1.503) | 0.057           |
| Reproductive system diseases | 1.049           | (0.976, 1.128) | 0.196           | 1.016           | (0.933, 1.105) | 0.727           | 1.284           | (1.071, 1.538) | 0.008           |
| Ophthalmic diseases          | 1.830           | (1.706, 1.964) | < 0.001         | 1.862           | (1.711, 2.027) | < 0.001         | 1.808           | (1.587, 2.060) | < 0.001         |
| Musculoskeletal diseases     | 1.548           | (1.440, 1.663) | < 0.001         | 1.666           | (1.527, 1.818) | < 0.001         | 1.322           | (1.163, 1.502) | < 0.001         |
| Mental illnesses             | 1.266           | (1.163, 1.379) | < 0.001         | 1.339           | (1.216, 1.473) | < 0.001         | 1.030           | (0.841, 1.262) | 0.751           |
| Laryngological diseases      | 1.411           | (1.301, 1.531) | < 0.001         | 1.477           | (1.343, 1.625) | < 0.001         | 1.251           | (1.067, 1.467) | 0.007           |
| Headaches                    | 2.176           | (2.016, 2.348) | < 0.001         | 2.231           | (2.043, 2.436) | < 0.001         | 2.132           | (1.815, 2.505) | < 0.001         |
| Head injuries                | 1.252           | (0.948, 1.653) | 0.128           | 1.508           | (1.055, 2.157) | 0.031           | 0.996           | (0.641, 1.547) | 1.000           |
| Dermatological diseases      | 1.065           | (0.991, 1.144) | 0.090           | 1.067           | (0.980, 1.162) | 0.134           | 1.060           | (0.925, 1.215) | 0.413           |
| Cardiovascular diseases      | 1.469           | (1.344, 1.605) | < 0.001         | 1.508           | (1.356, 1.676) | < 0.001         | 1.382           | (1.173, 1.628) | < 0.001         |
| Digestive system diseases    | 1.109           | (1.031, 1.194) | 0.006           | 1.172           | (1.075, 1.278) | < 0.001         | 0.963           | (0.836, 1.109) | 0.613           |

RR – Risk Ratio; *p*-value – Fisher’s exact test *p*-value; 95% RR CI – 95% Risk Ratio Confidence Interval
